# Supplementary material
Source: publisher figshare collection journal article supplement (https://acs.figshare.com/ndownloader/files/13549730)
Supplement: Supplementary file 1 [file 13549730]

## Sheet: Primers
SHAPE-seq primers and samples annotations of PP7_wt_d6
#	Primer name	Sequence (5' --> 3')
	Primers for reverse transcription
1	mCherry RT primer	CTTCAGCTTGGCGGTCTGG
	Primers for ssDNA adapter ligation
2	ssDNA adapter1	/5Phos/AGATCGGAAGAGCACACGTCTGAACTCCAGTCAC/3SpC3/
	Selection primers for dsDNA sequecning library preparation
3	mCherry selection primer2	CTTTCCCTACACGACGCTCTTCCGATCTCTTCAGCTTGGCGGTCTGGG*T*G*C
	TruSeqTM primers for dsDNA sequecning library preparation		samples annotations	comments
4	Universal Adapter	AATGATACGGCGACCACCGAGATCTACACTCTTTCCCTACACGACGCTCTTCCGATCT	For all
5	Illumina Index #1	CAAGCAGAAGACGGCATACGAGATCGTGATGTGACTGGAGTTCAGACGTGTGCTC	in-vitro +RBP, modified	Replicate 1
6	Illumina Index #2	CAAGCAGAAGACGGCATACGAGATACATCGGTGACTGGAGTTCAGACGTGTGCTC	in-vitro +RBP, non-modified
7	Illumina Index #3	CAAGCAGAAGACGGCATACGAGATGCCTAAGTGACTGGAGTTCAGACGTGTGCTC	in-vitro -RBP, modified
8	Illumina Index #4	CAAGCAGAAGACGGCATACGAGATTGGTCAGTGACTGGAGTTCAGACGTGTGCTC	in-vitro -RBP, non-modified
9	Illumina Index #5	CAAGCAGAAGACGGCATACGAGATCACTGTGTGACTGGAGTTCAGACGTGTGCTC	in-vitro +RBP, modified	Replicate 2
10	Illumina Index #6	CAAGCAGAAGACGGCATACGAGATATTGGCGTGACTGGAGTTCAGACGTGTGCTC	in-vitro +RBP, non-modified
11	Illumina Index #7	CAAGCAGAAGACGGCATACGAGATGATCTGGTGACTGGAGTTCAGACGTGTGCTC	in-vitro -RBP, modified
12	Illumina Index #8	CAAGCAGAAGACGGCATACGAGATTCAAGTGTGACTGGAGTTCAGACGTGTGCTC	in-vitro -RBP, non-modified
13	Illumina Index #22	CAAGCAGAAGACGGCATACGAGATCGTACGGTGACTGGAGTTCAGACGTGTGCTC	in-vivo, induced, modified	Replicate 1+2 from different days and runs
14	Illumina Index #23	CAAGCAGAAGACGGCATACGAGATCCACTCGTGACTGGAGTTCAGACGTGTGCTC	in-vivo, induced, non-modified
15	Illumina Index #25	CAAGCAGAAGACGGCATACGAGATATCAGTGTGACTGGAGTTCAGACGTGTGCTC	in-vivo, non-induced, modified
16	Illumina Index #27	CAAGCAGAAGACGGCATACGAGATAGGAATGTGACTGGAGTTCAGACGTGTGCTC	in-vivo, non-induced, non-modified
	1	/5Phos/ = idt label for 5' phosphorylation; /3SpC3/ = idt label for C3 spacer phosphoramidite
	2	Four nucleotide addition to primer that bind only in mCherry transcript; avoids amplification of RT-primer/ssDNA adapter products; * = idt label for phosphorothioate modification
